# Supplementary material
Source: PubMed Central journal article supplement (PMC2862844)
Supplement: NIHMS178435-supplement-01.pdf [file NIHMS178435-supplement-01.pdf]

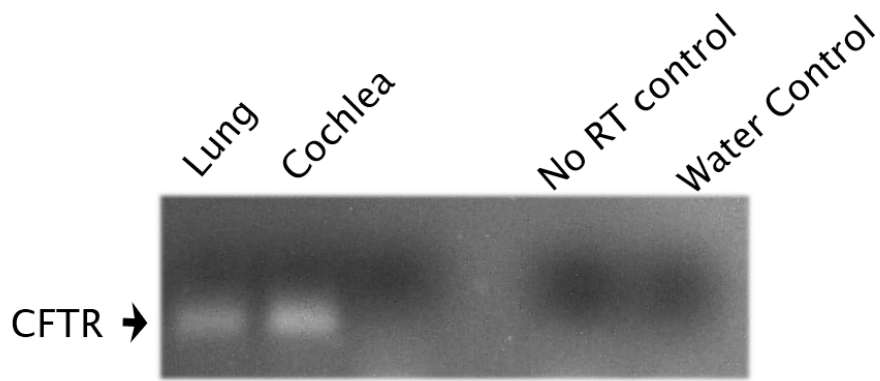

**Fig. S1.** Analysis of CFTR expression in cochleae using RT-PCR. Agarose gel electrophoresis image of PCR-amplified CFTR cDNA derived from cochlea and lung tissue. 250 ng of total RNA from lung and cochleae tissues were used for reverse transcription (RT) respectively. 2 $\mu$ l of RT-reaction (20 % of total RT-reaction) was used to perform PCR. Half of PCR product was loaded and run on 2% agarose gel. A 259 bp band is expected from the amplicon of an upper primer (match 4306-4329 bp of CFTR sequence) and a lower primer (match 4542-4565 bp). The expected bands were found in lung and cochlea samples, but not in “water control” sample and “No RT control” sample. The “No RT control” has 250 ng cochlear RNA and other RT-PCR components except no Superscript II, RNase H-Reverse Transcriptase during RT reaction.
