# Supplementary material
Source: PubMed Central journal article supplement (PMC2862844)
Supplement: NIHMS178435-supplement-02.pdf [file NIHMS178435-supplement-02.pdf]

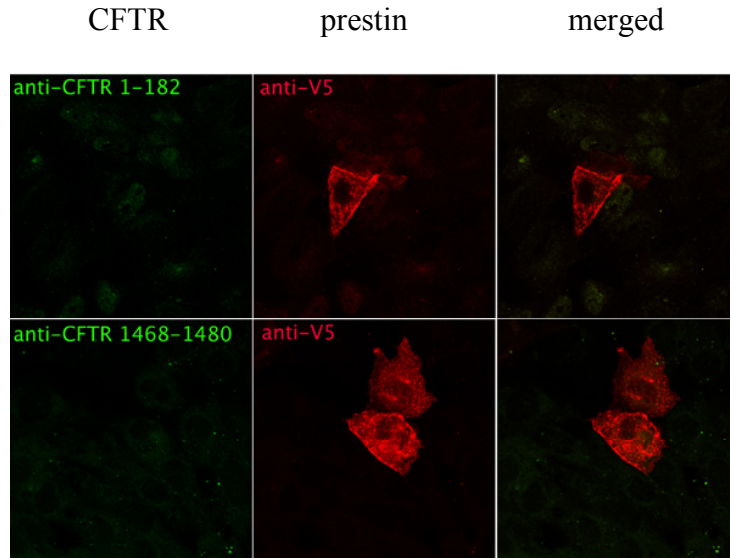

**Fig. S2. Testing anti-CFTR specificity on prestin-expressing cells.** OK cells were transiently transfected with C-V5-tagged prestin. Images on the upper row were incubated with anti-CFTR 1-183 and anti-V5. Images on the lower row were incubated with anti-CFTR 1486-1480 plus anti-V5. Neither one of the CFTR antibodies showed clear staining of OK cells expressing prestin, verifying the specificity of the CFTR antibodies used in the present study.
